# Supplementary material
Source: PubMed Central journal article supplement (PMC11310574)

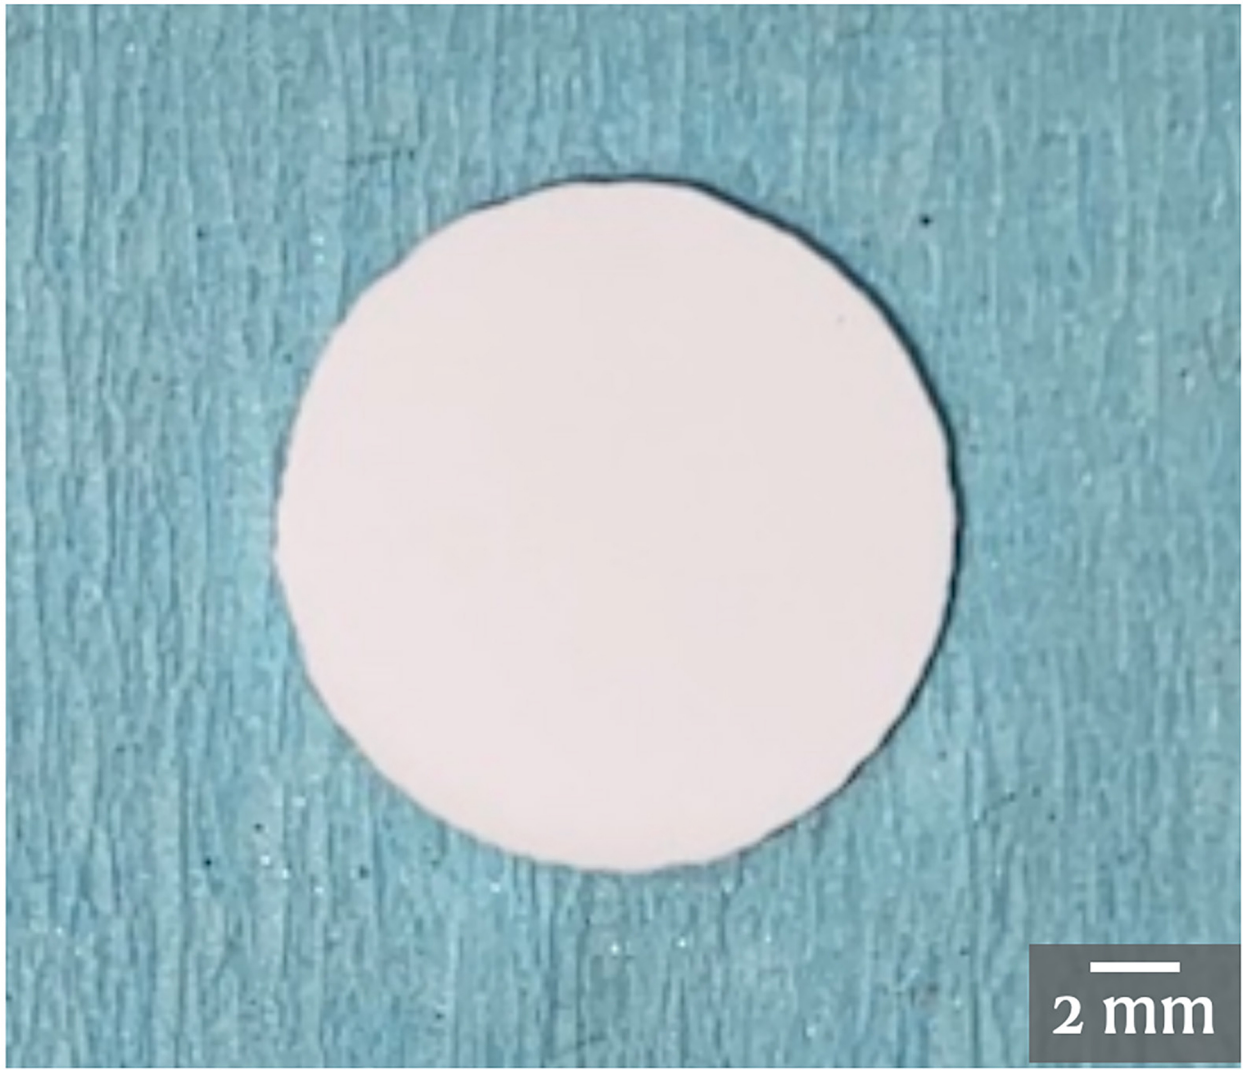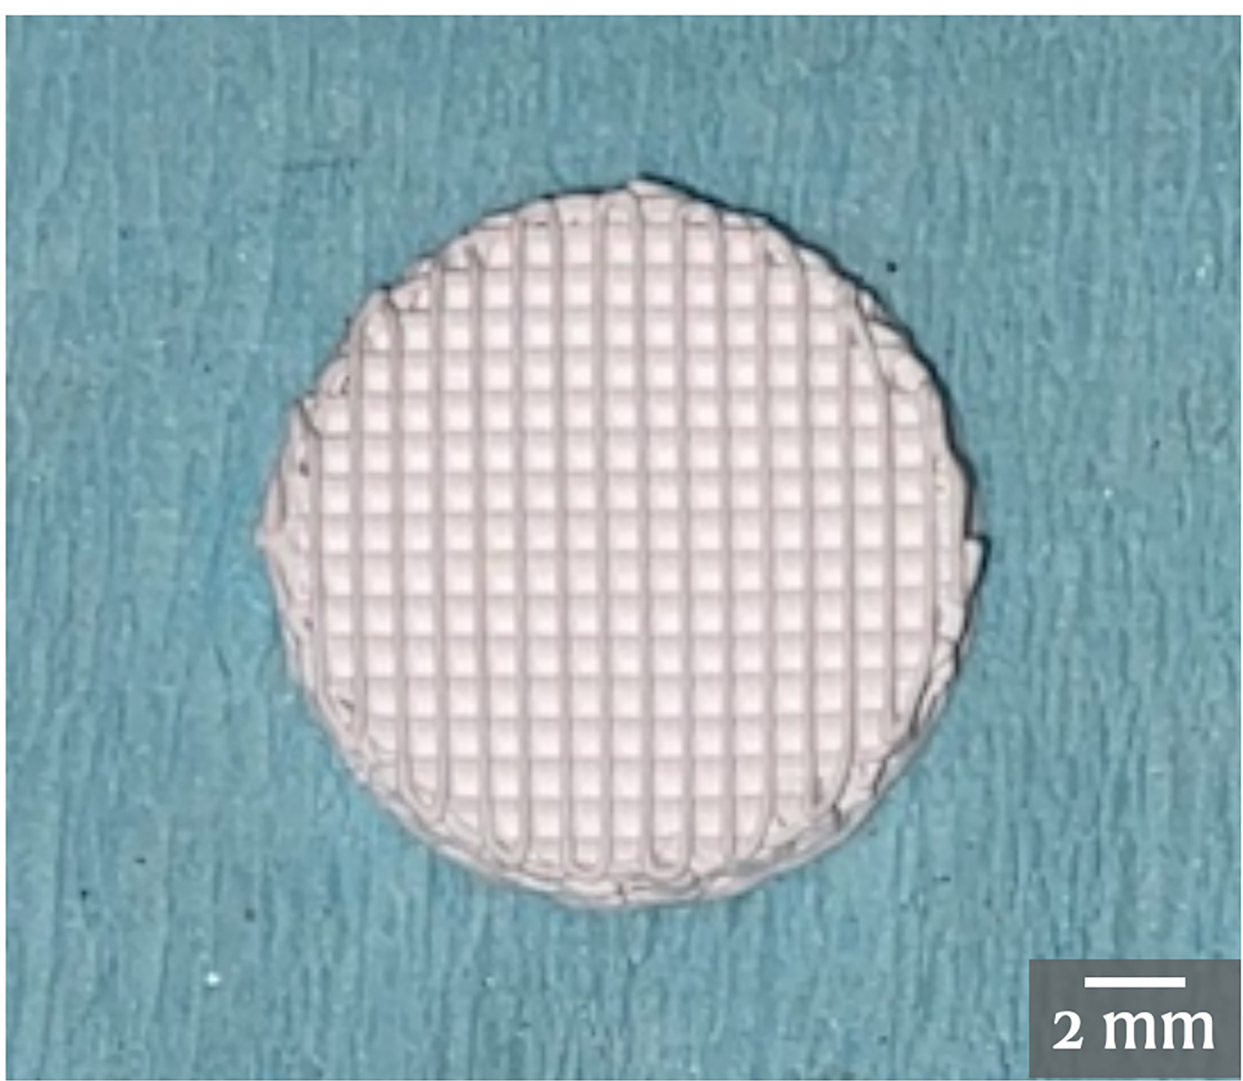

Supplement: NIHMS2005785-supplement-Supplemental__1.pdf [file NIHMS2005785-supplement-Supplemental__1.pdf]

Native Bone

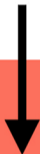

Calvaria

Bone in Scaffold

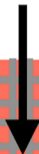

Scaffold

Native Bone

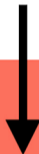

Calvaria

Sagittal Plane

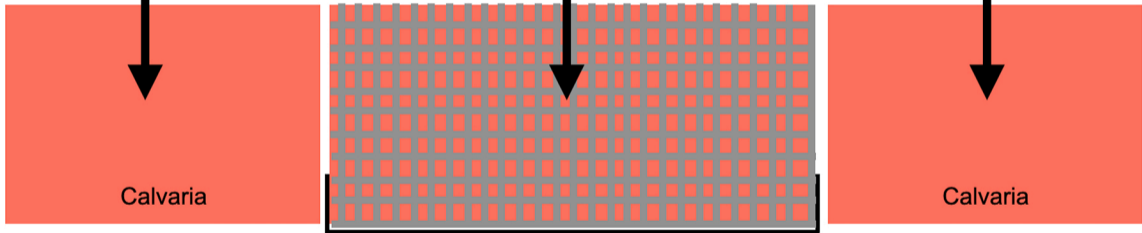

Supplement: NIHMS2005785-supplement-Supplemental__2.pdf [file NIHMS2005785-supplement-Supplemental__2.pdf]
